# Supplementary figures and images for: Prostate Cancer in Renal Transplant Recipients: Results from a Large Contemporary Cohort
Source: MDPI journal article supplement (doi:10.3390/cancers15010189), 2022-12-28

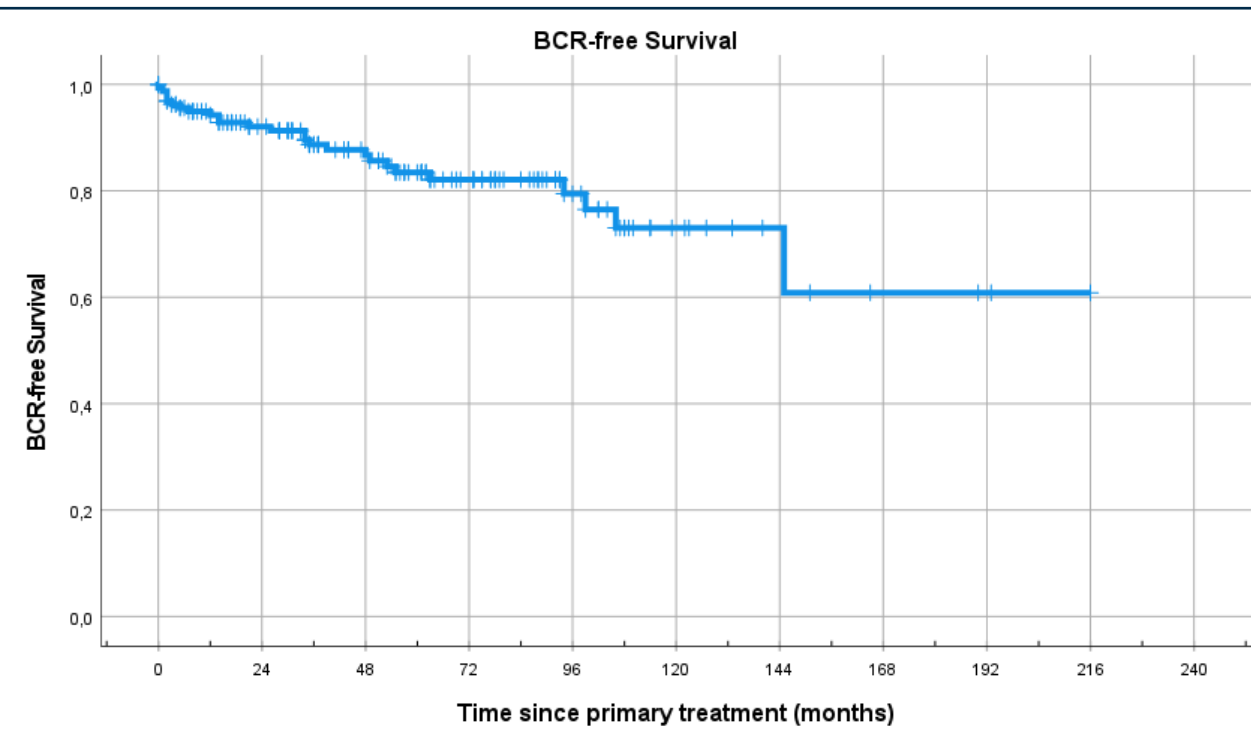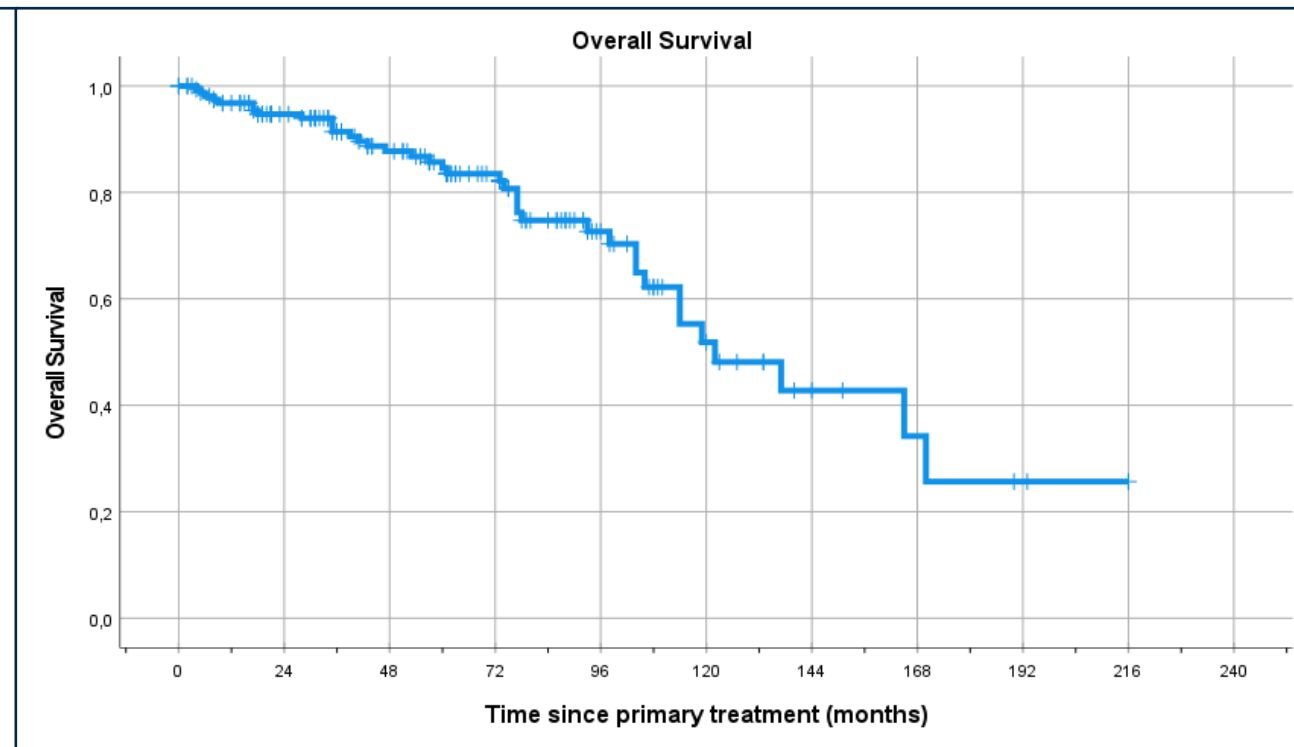

Supplement: s1 [file s1]
